# Supplementary material for: A microfluidic method to measure bulging heights for bulge testing of polydimethylsiloxane (PDMS) and polyurethane (PU) elastomeric membranes
Source: Royal Society of Chemistry journal article supplement (doi:10.1039/c8ra01256c), 2018-01-01
Supplement: c8ra01256c1.pdf [file c8ra01256c1.pdf]

## Supporting Information

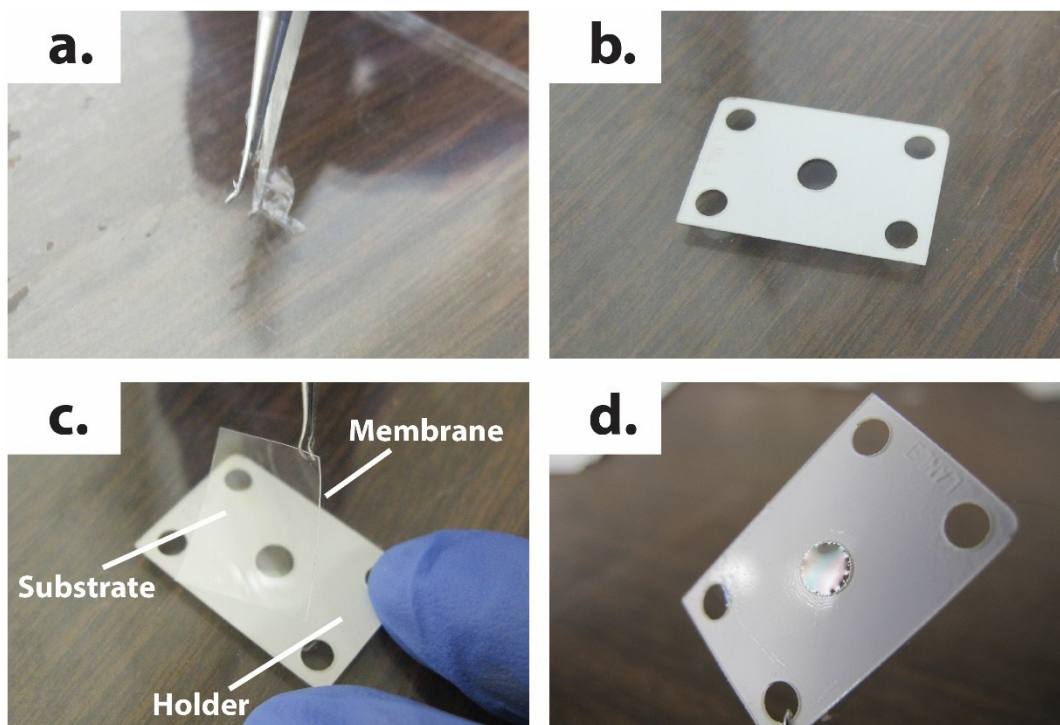

**FIG. S1.** (a) The crumple of PDMS. (b) Laser cut membrane holder with adhesive tape. (c) PDMS membrane coated on the polycarbonate film was placed on the membrane holder. Once the PDMS membrane was attached to the holder, the substrate can be removed and the PDMS membrane remained on the holder. (d) The PDMS membrane was bound on the holder.

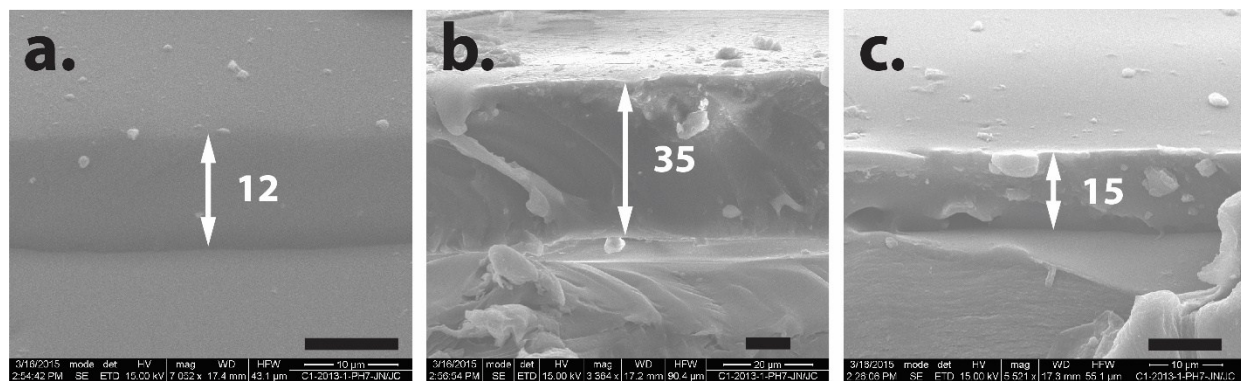

**FIG. S2.** The thickness of the thin membrane can be measured using scanning electron microscope. (a) PDMS membrane with 12  $\mu\text{m}$  of thickness. (b) PDMS membrane with 35  $\mu\text{m}$  of thickness. (c) PU membrane with 15  $\mu\text{m}$  of thickness. Each scale bar equals to 10  $\mu\text{m}$ .

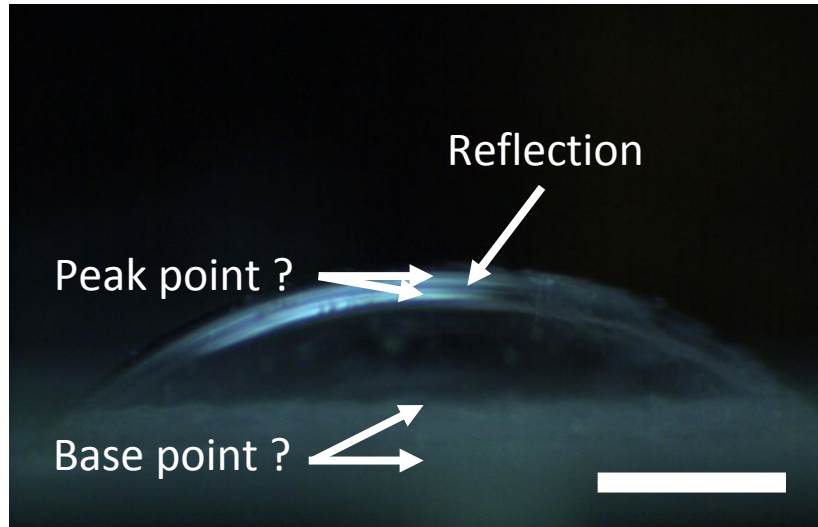

**FIG. S3.** The bulging height of PDMS membrane was determined using a stereo microscope. The image shows that the bulging of membrane is a form of spherical cap. The bulging height can be determined by measuring the length between peak point and base point. The figure shows that the peak and base point can be subject to interpretation.

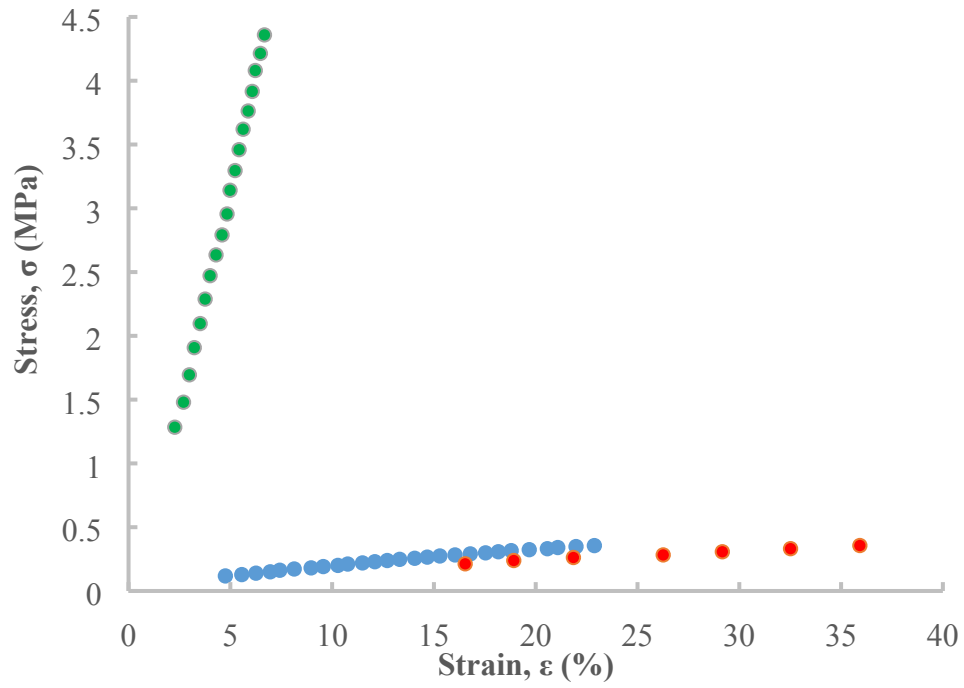

**FIG. S4.** The stress-strain curves obtained using microfluidic-based bulging test device. PDMS membrane with 35  $\mu\text{m}$  thickness (blue dots). PDMS membrane with 12  $\mu\text{m}$  thickness (red dots). PU membrane with 15  $\mu\text{m}$  thickness (green dots).

**Table S1.** The sensitivity of the microfluidic method to measure minimum bulging heights for a channel width of 1 mm and observed liquid displacement length of 1 mm. This shows that by designing the channels heights and bulging windows one can measure very small bulging heights that would be difficult to detect by other means.

| <b>Channel height<br/>(<math>h</math>, mm)</b> | <b>Bulging window<br/>radius (<math>r</math>, mm)</b> | <b>Bulging height<br/>difference (<math>\Delta w_0</math>, <math>\mu\text{m}</math>)</b> |
|------------------------------------------------|-------------------------------------------------------|------------------------------------------------------------------------------------------|
| 0.25                                           | 2                                                     | 36                                                                                       |
| 0.1                                            |                                                       | 16                                                                                       |
| 0.05                                           |                                                       | 8                                                                                        |
| 0.25                                           | 3                                                     | 18                                                                                       |
| 0.1                                            |                                                       | 7                                                                                        |
| 0.05                                           |                                                       | 3                                                                                        |
